# Supplementary material
Source: PubMed Central journal article supplement (PMC6421364)

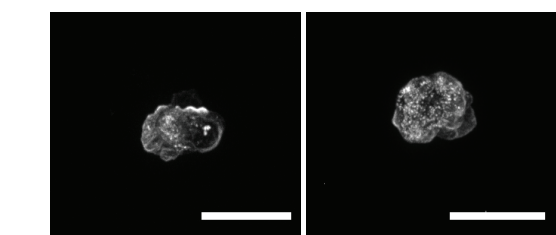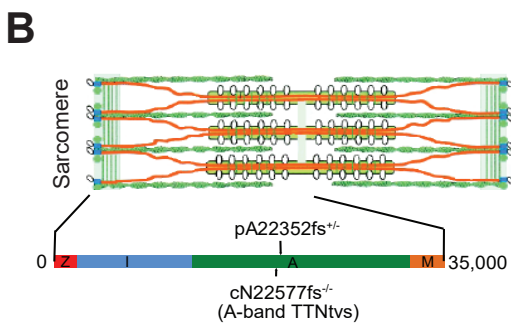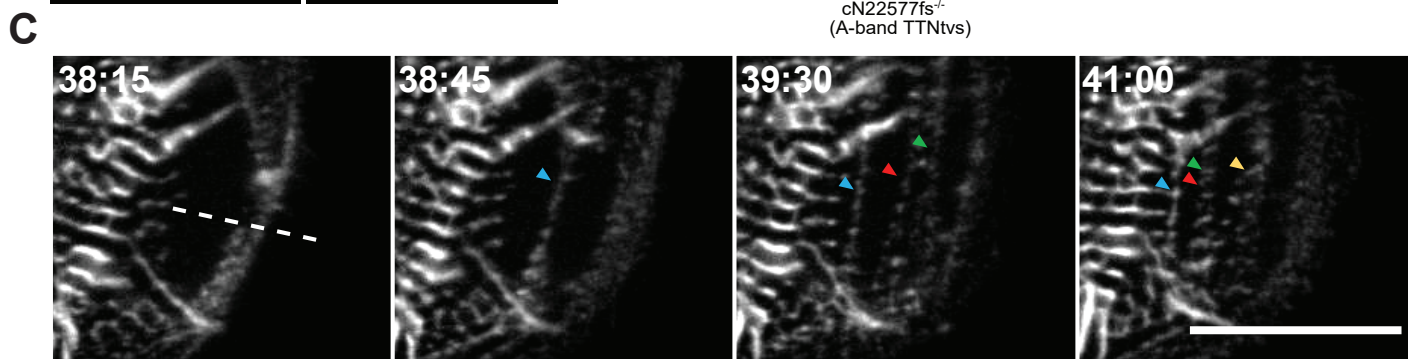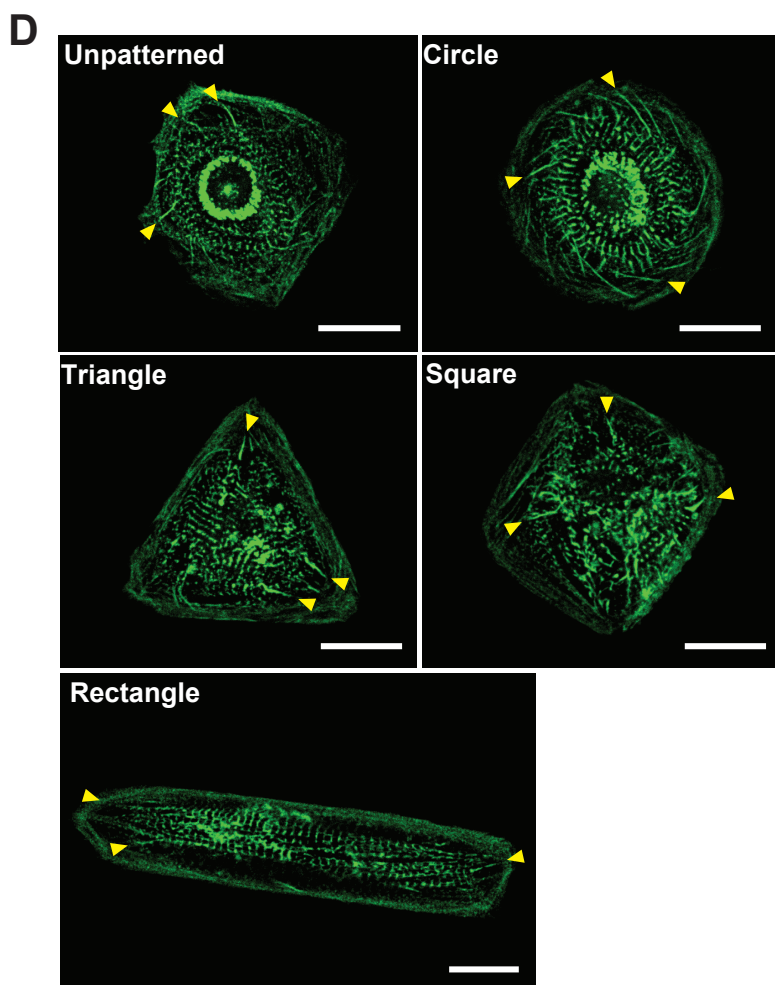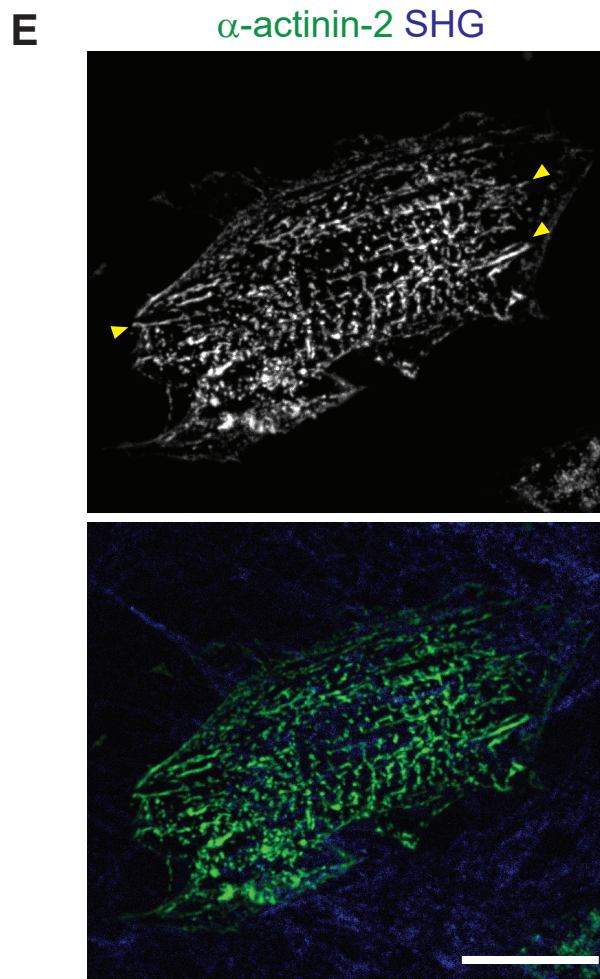

**Figure S1. Related to Figure 1.** (A) Representative images of cardiomyocytes detached from the substrate using trypsin, fixed and stained for actinin, indicating sarcomere disassembly. Scale bars 20  $\mu\text{m}$ . (B) Schematic representation of the cardiac sarcomere with actinin (light green), TTN (orange), thick filaments (white heads), and thin filaments (green). TTN protein segments (z-disc, red; I-band, blue; A-band, green; M-band, gold) with location of human (“p” patient-derived; “c” CRISRP/CAS9-generated) mutations. (C) Time lapse images of WT cells expressing GFP actinin, colored arrows indicate the appearance of transverse actinin fibers. Scale bar 20  $\mu\text{m}$ . (D) Representative images of GFP actinin WT cells plated on unpatterned or fibronectin patterned islands of various geometries displaying centripetal fibers as indicated by yellow arrows. Scale bars 20  $\mu\text{m}$ . (E) (Top) representative image of a cardiomyocyte in a 3D cardiac microtissues (collagen: SHG, second harmonic generation) in engineered heart microtissues, arrows indicate the appearance of centripetal actinin fibers (green). Scale bars 20 $\mu\text{m}$ .

**A**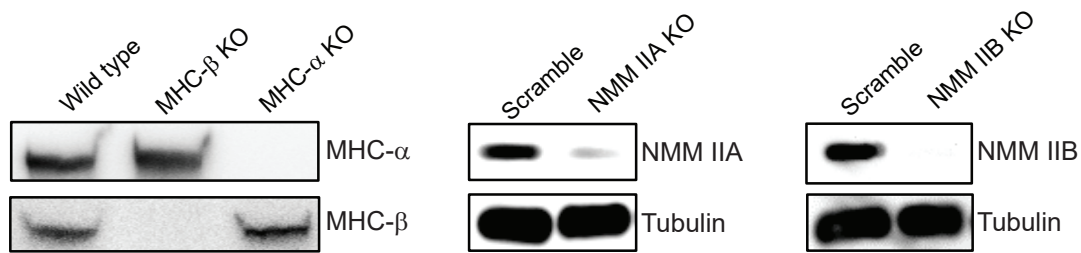**B**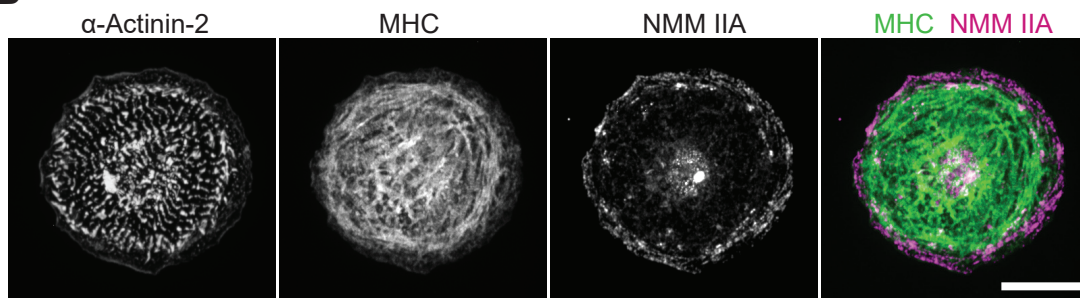**C**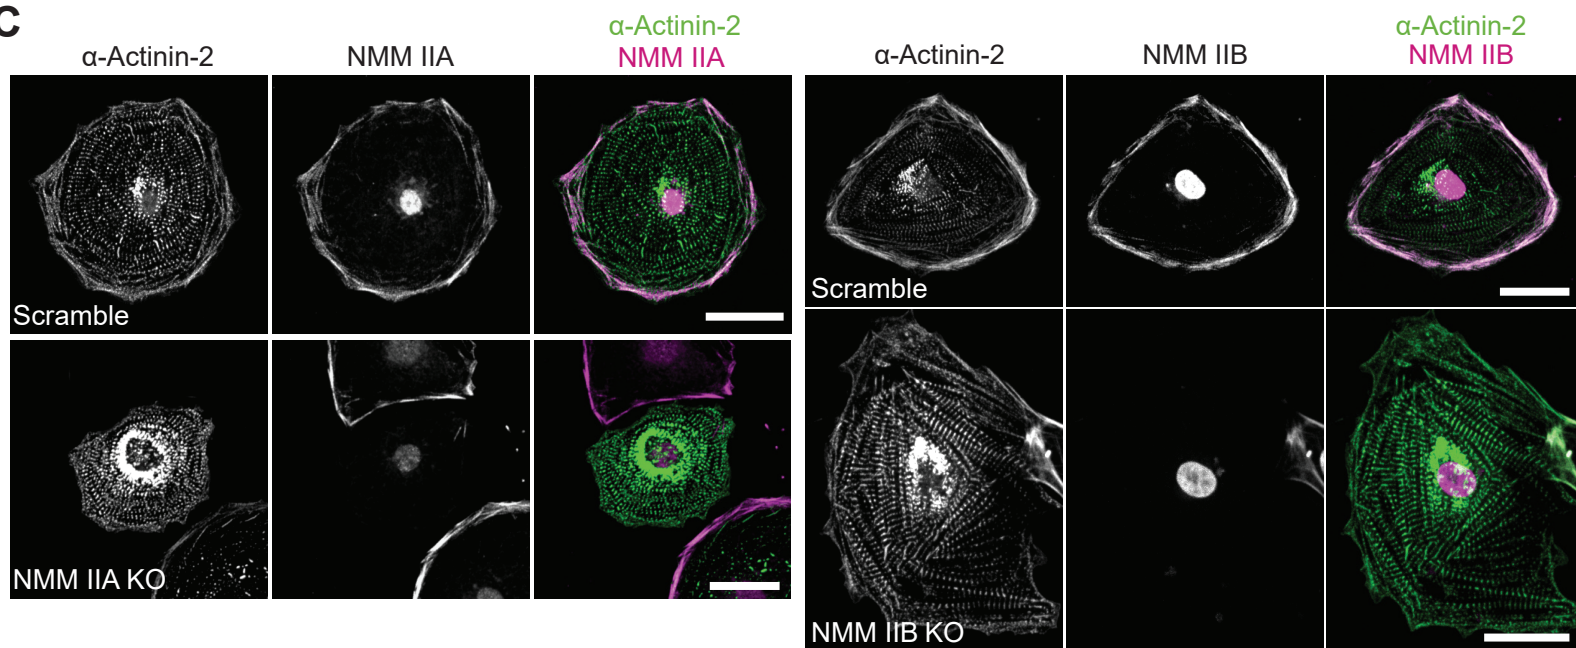**D**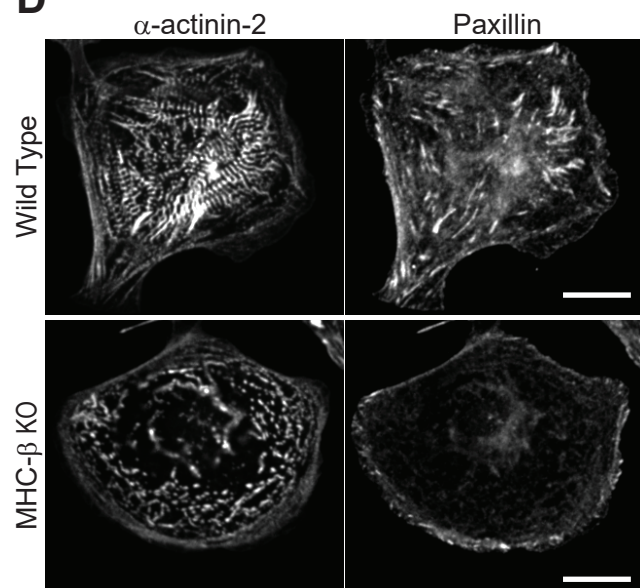**Figure S2**

**Figure S2. Related to Figure 3.** (A) Western blots (left to right) of WT, MHC- $\alpha$ , MHC- $\beta$  KO, NMM IIA and NMM IIB knock out cells normalized for protein loading, and probed with antibodies to MHC- $\alpha$ , MHC- $\beta$ , NMM IIA and NMM IIB. (B) Image of cardiomyocyte patterned on a circular fibronectin island and stained for (left to right) actinin, myosin heavy chain (pan MHC), NMM IIA, showing the differential localization of the myosins. Scale Bar 20  $\mu$ m. (C) (left) Representative image of scramble (top) and NMM IIA KO (bottom) cells fixed and stained for actinin and NMM IIA. Scale bars 20  $\mu$ m. (right) Representative image of scramble (top) and NMM IIB KO (bottom) cells fixed and stained for actinin and NMM IIB using an Alexa Fluor568 direct conjugation. Scale bars 20  $\mu$ m. (D) Top and bottom panel (left to right) representative images of cells stained for actinin and paxillin in wild type and MHC- $\beta$  KO cells. Scale bars 20  $\mu$ m

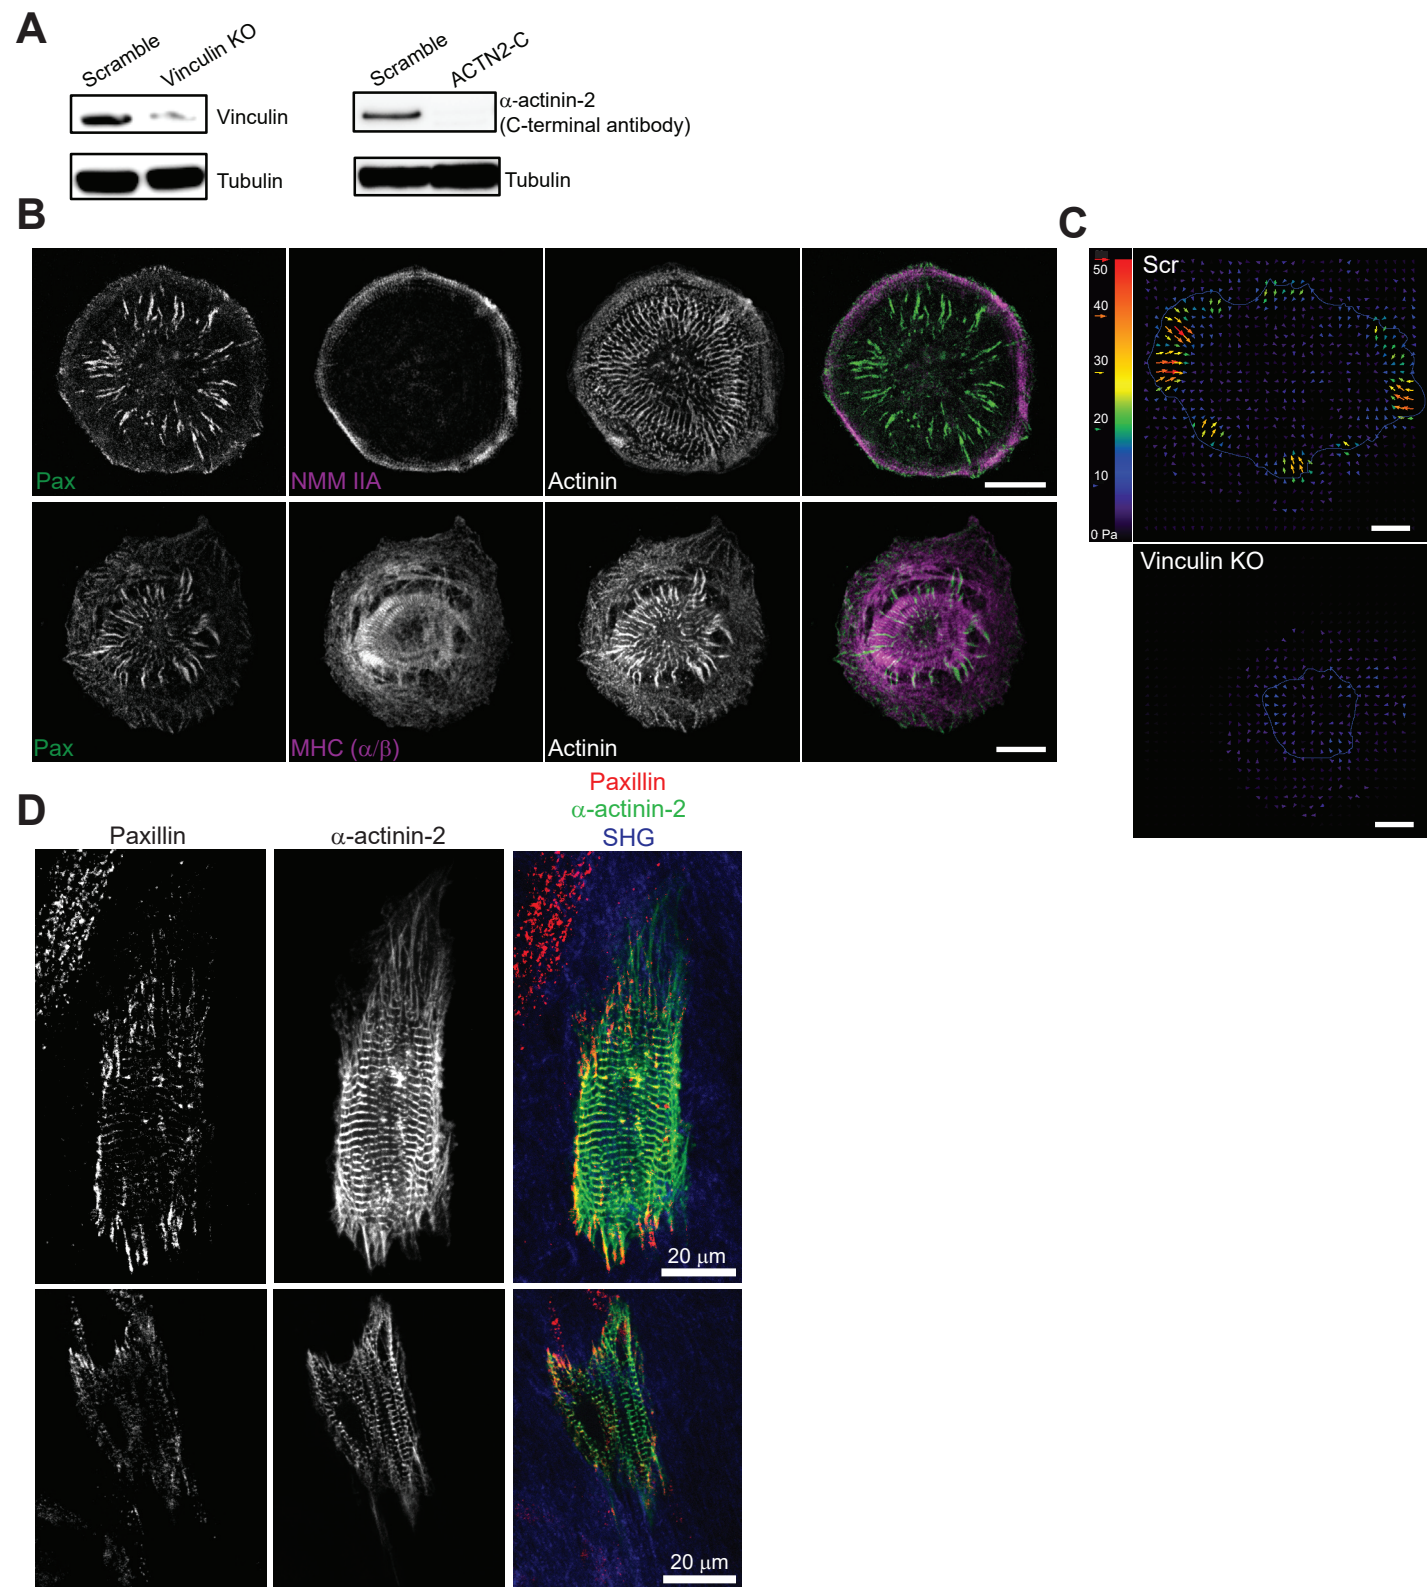

**Figure S3**

**Figure S3. Related to Figure 4.** (A) Western blots (left to right) of Scramble, vinculin KO and ACTN2-C KO cells normalized for protein loading, and probed with antibodies to vinculin and actinin-2 (c terminal). (B) Cardiomyocytes patterned on circular fibronectin islands fixed and stained for paxillin (green), NMM IIA (purple, top panel), muscle myosin (pan-MHC, purple, bottom panel) and actinin (white) show the existence of muscle myosin, but not non-muscle myosin, in centripetal fibers and protocostameres. Scale bar 20  $\mu\text{m}$ . (C) Representative stress maps of wild type and vinculin KO cells. Scale bars 20  $\mu\text{m}$ . (D) Top and bottom panel (left to right) representative images of cardiomyocytes within 3D engineered cardiac microtissues stained for actinin (green) and paxillin (red). Collagen visualized by second harmonic generation (blue, SHG). Scale Bar 20  $\mu\text{m}$ .

Suppl. Fig. 2A

MHC- $\beta$

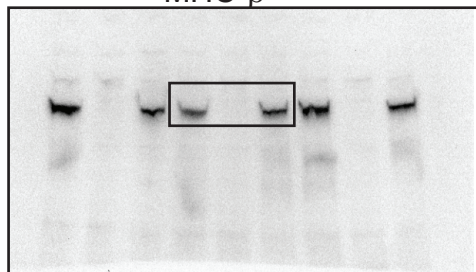

MHC- $\alpha$

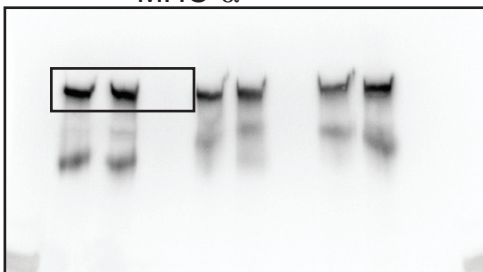

Suppl. Fig. 2A

NMM IIA, Tubulin

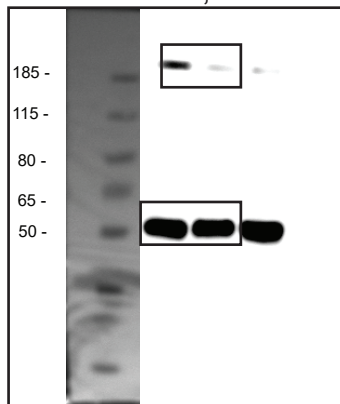

NMM IIB, Tubulin

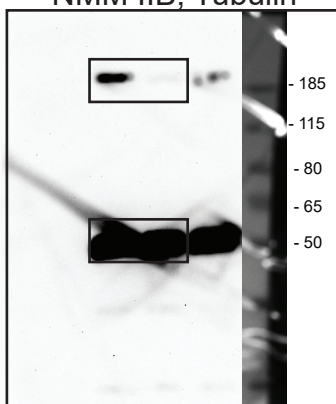

Suppl. Fig. 3A

C-term ACTN2, Tubulin

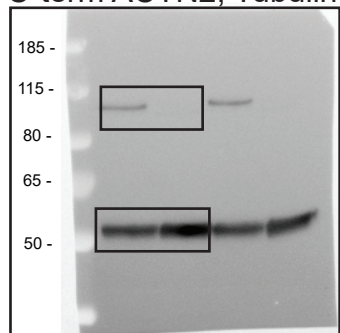

Vinculin, Tubulin

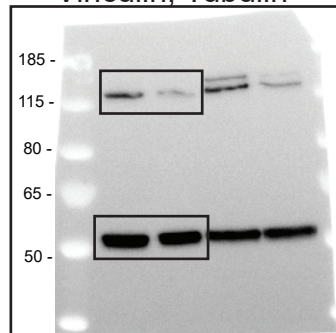

Supplementary Figure 4

**Figure S4. Related to Figures 3 and 4. Uncropped Western blot images.**



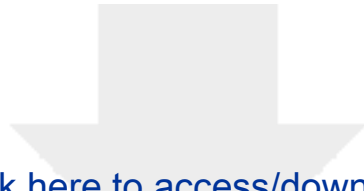

[Click here to access/download](#)

**Supplemental Movies and Spreadsheets**  
Supplementary Movie 1.mov

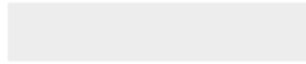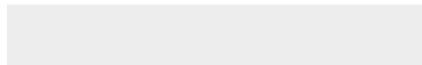



[Click here to access/download](#)

**Supplemental Movies and Spreadsheets**  
Supplementary Movie 2.mov





[Click here to access/download](#)

**Supplemental Movies and Spreadsheets**  
Supplementary Movie 3.mov

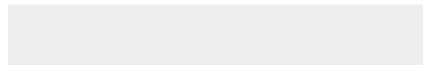



[Click here to access/download](#)

**Supplemental Movies and Spreadsheets**  
Supplementary Movie 4.mov





[Click here to access/download](#)

**Supplemental Movies and Spreadsheets**  
Supplementary Movie 5.mov





Click here to access/download

**Supplemental Movies and Spreadsheets**  
Supplementary Movie 6.mov





[Click here to access/download](#)

**Supplemental Movies and Spreadsheets**  
Supplementary Movie 7.mov





Click here to access/download

**Supplemental Movies and Spreadsheets**  
Supplementary Movie 8.mov







[Click here to access/download](#)

**Supplemental Movies and Spreadsheets**  
Supplementary Movie 9.mov





[Click here to access/download](#)

**Supplemental Movies and Spreadsheets**  
Supplementary Movie 10.mov



Supplement: NIHMS1000013-supplement-11.pdf [file NIHMS1000013-supplement-11.pdf]
